# Supplementary material
Source: publisher figshare collection journal article supplement (https://acs.figshare.com/ndownloader/files/17938439)
Supplement: Supplementary file 1 [file 17938439]

## *Supporting information*

### Effects of Cu precursor type on the catalytic activity of Cu/ZrO<sub>2</sub> towards methanol synthesis *via* CO<sub>2</sub> hydrogenation

Shohei Tada,<sup>a\*</sup> Kazumasa Oshima,<sup>b</sup> Yoshihiro Noda,<sup>b</sup> Ryuji Kikuchi,<sup>a</sup> Minoru Sohmiya,<sup>b</sup> Tetsuo Honma,<sup>c</sup> Shigeo Satokawa<sup>b\*</sup>

a Department of Chemical System Engineering, Graduate School of Engineering, The University of Tokyo, 7-3-1 Hongo, Bunkyo-ku, 113-8656 Tokyo, Japan.

b Department of Materials and Life Science, Faculty of Science and Technology, Seikei University, 3-3-1 Kichijoji-kitamachi, Musashino-shi, Tokyo 180-8633, Japan.

c Japan Synchrotron Radiation Research Institute, Sayo-cho, Sayo-gun, Hyogo 679-5198, Japan.

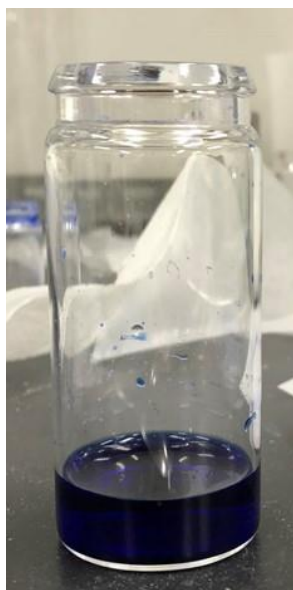

**Figure S1** Photograph of copper ammine complex solution.

## **Section S1 Validation of our experimental condition for N<sub>2</sub>O titration**

In our previous work, the experimental condition of N<sub>2</sub>O titration for Cu-based catalysts were examined using a series of Cu/SiO<sub>2</sub> catalysts <sup>1</sup>.

Prior to the examination, H<sub>2</sub> chemisorption for the catalysts was investigated at 25 °C *via* experiments and calculation. We confirmed that H<sub>2</sub> molecules adsorb on the surface of Cu<sup>0</sup> nanoparticles. The maximum H<sub>2</sub> uptake was 0.46 H<sub>2</sub> molecules per Cu surface atoms. The value (0.46) was slightly higher than the stoichiometry of H<sub>2</sub> to Cu (Cu + 0.5 H<sub>2</sub> = Cu-H).

When the N<sub>2</sub>O titration was carried out at 90 °C, the amount of decomposed N<sub>2</sub>O was almost the same to the H<sub>2</sub> uptake. The experiments clarified that the stoichiometry of N<sub>2</sub>O to Cu was 0.5 mol<sub>N<sub>2</sub>O</sub> mol<sub>Cu</sub><sup>-1</sup>. The stoichiometry (0.5 mol<sub>N<sub>2</sub>O</sub> mol<sub>Cu</sub><sup>-1</sup>) is also expected from the equation of N<sub>2</sub>O titration (Cu + 0.5 N<sub>2</sub>O = Cu<sub>2</sub>O + 0.5 N<sub>2</sub>). X-ray absorption spectroscopy measurements showed that the N<sub>2</sub>O-treated Cu/SiO<sub>2</sub> catalysts possessed Cu-O scattering path with the distance = 1.82 Å which was similar to that of Cu<sub>2</sub>O (1.85 Å) and different from that of CuO (1.96 Å). In consequence, the N<sub>2</sub>O titration at 90 °C oxidizes the exposed Cu<sup>0</sup> surface to Cu<sup>+</sup>, not the Cu<sup>0</sup> bulk.

Here, we explained the detection way of N<sub>2</sub> and N<sub>2</sub>O not using any column. **Figure S2** shows the typical N<sub>2</sub>O titration sequence. A thermal conductivity detector was used to measure the gas composition of N<sub>2</sub> and N<sub>2</sub>O in a He stream (a carrier gas). In the figure, twenty peaks are observed. The peak size of N<sub>2</sub> must be smaller than that of N<sub>2</sub>O due to the thermal conductivity difference: thermal conductivities of N<sub>2</sub>, N<sub>2</sub>O, and He (a carrier gas) at STP are 0.026, 0.017, and 0.149 W mK<sup>-1</sup>, respectively <sup>2</sup>. For the first four peaks, their area was *ca.* 55000 count sec and their height was *ca.* 4700 count. The peaks are attributed to N<sub>2</sub> decomposed from N<sub>2</sub>O. For the last six peaks, their area was *ca.* 65000 count sec and their height was *ca.* 5500 count. The peaks are attributed to N<sub>2</sub>O which was not decomposed on the Cu-based catalysts. In addition, the other peaks are attributed to the mixture gas of N<sub>2</sub> and N<sub>2</sub>O. Our previous work <sup>1</sup> also used this detection way and came up with the conclusion described in the previous paragraph.

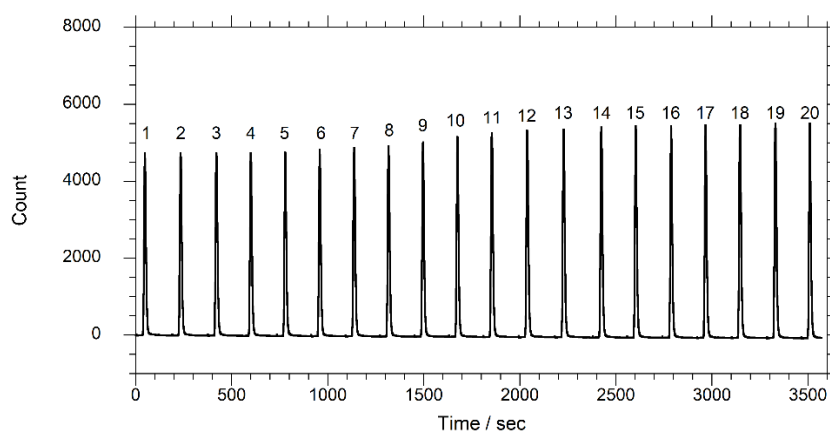

**Figure S2** N<sub>2</sub>O titration sequence for **NIT-500** at 90 °C. Carrier gas: He.

**Table S1** Height and area of peaks in **Figure S1** and N<sub>2</sub>/N<sub>2</sub>O composition.

| No. | Peak height | Peak area   | Composition calculated from peak areas / % |                  |
|-----|-------------|-------------|--------------------------------------------|------------------|
|     | / count     | / count sec | N <sub>2</sub>                             | N <sub>2</sub> O |
| 1   | 4728        | 54940       | 100                                        | 0                |
| 2   | 4723        | 54978       | 100                                        | 0                |
| 3   | 4726        | 54895       | 100                                        | 0                |
| 4   | 4726        | 54865       | 100                                        | 0                |
| 5   | 4762        | 56449       | 86                                         | 14               |
| 6   | 4811        | 57603       | 74                                         | 26               |
| 7   | 4870        | 57857       | 71                                         | 29               |
| 8   | 4943        | 57976       | 70                                         | 30               |
| 9   | 5031        | 59682       | 53                                         | 47               |
| 10  | 5155        | 62483       | 25                                         | 75               |
| 11  | 5258        | 63604       | 14                                         | 86               |
| 12  | 5326        | 63683       | 13                                         | 87               |
| 13  | 5371        | 62656       | 23                                         | 77               |
| 14  | 5404        | 64792       | 2                                          | 98               |
| 15  | 5436        | 65002       | 0                                          | 100              |
| 16  | 5452        | 65221       | 0                                          | 100              |
| 17  | 5474        | 65352       | 0                                          | 100              |
| 18  | 5485        | 65821       | 0                                          | 100              |
| 19  | 5495        | 65156       | 0                                          | 100              |
| 20  | 5504        | 66061       | 0                                          | 100              |

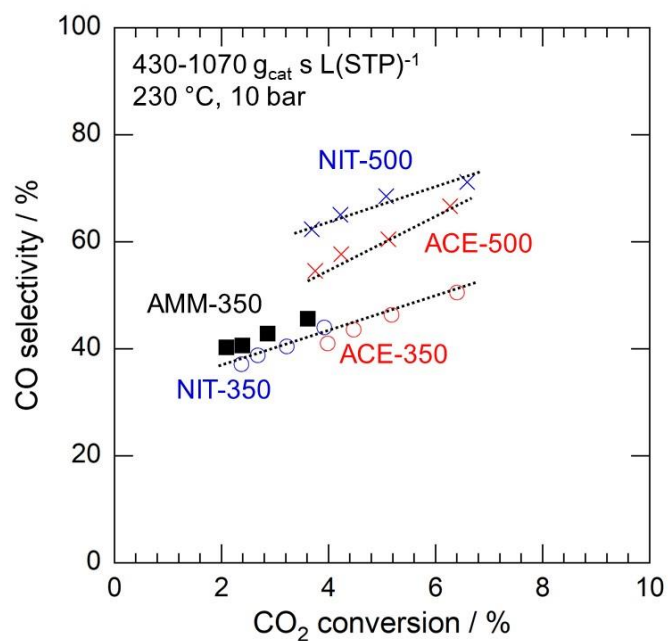

**Figure S3** CO selectivity at different CO<sub>2</sub> conversions for **NIT-*T*** and **ACE-*T*** samples.

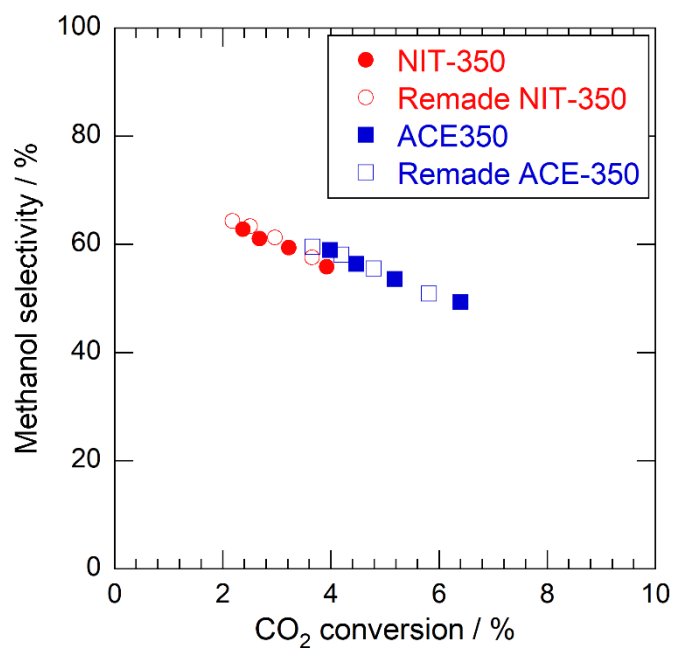

**Figure S4** Methanol selectivity at different CO<sub>2</sub> conversion for **NIT-350**, remade **NIT-350**, **ACE-350**, and remade **ACE-350**.

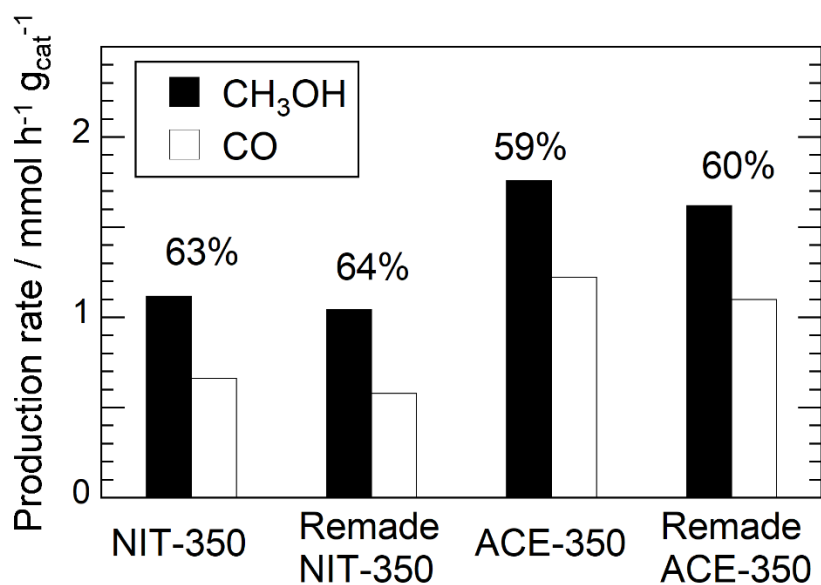

**Figure S5** Methanol and CO production rates for **NIT-350**, remade **NIT-350**, **ACE-350**, and remade **ACE-350** when the contact time was 430 g<sub>cat</sub> s L(STP)<sup>-1</sup>. The values above the bars indicate their selectivity towards methanol.

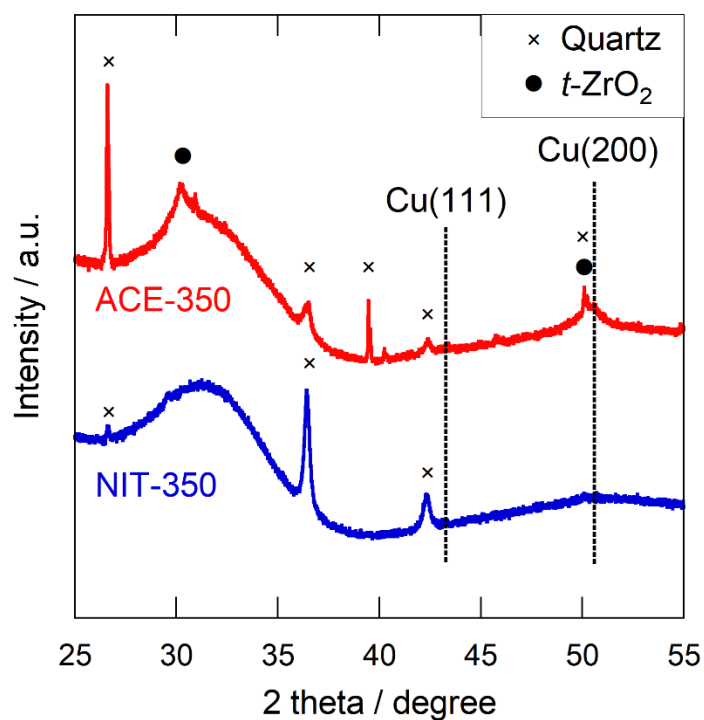

**Figure S6** PXRD patterns for spent **ACE-350** and **NIT-350**. Although the quartz sand was removed as much as possible from the spent catalysts, it remained a little and was detected by PXRD.

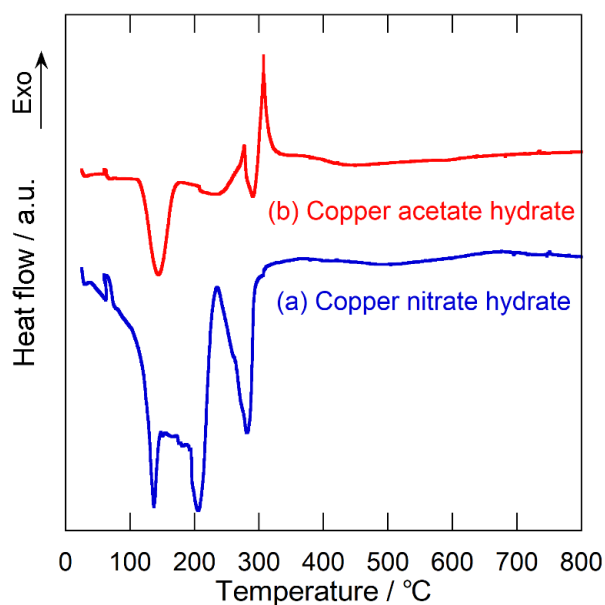

**Figure S7** DTA curves for (a) copper nitrate hydrate and (b) copper acetate hydrate. Heating rate:  $10\text{ }^{\circ}\text{C min}^{-1}$ .

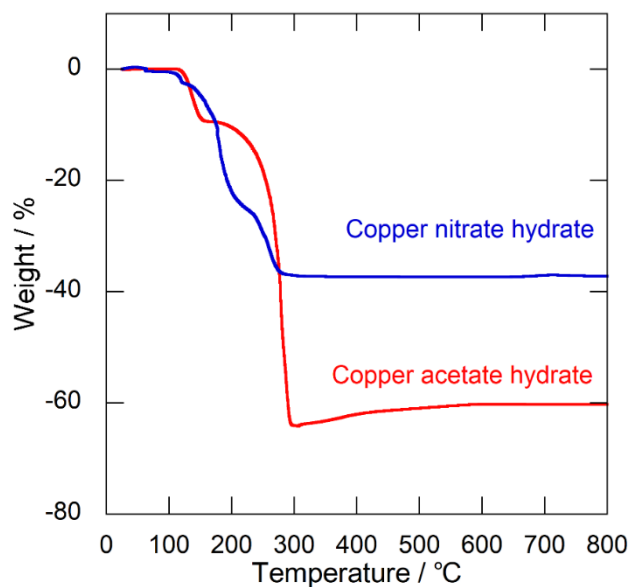

**Figure S8** TG curves of copper nitrate hydrate and copper acetate hydrate. For copper acetate hydrate, the sample gains weight with increasing calcination temperature starting from 300 °C. Heating rate:  $10\text{ }^{\circ}\text{C min}^{-1}$ .

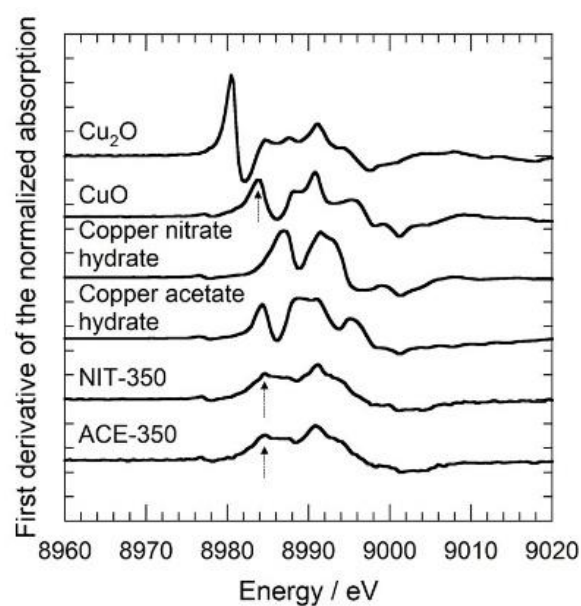

**Figure S9** First derivative XANES spectra of **NIT-350**, **ACE-350**,  $\text{Cu}_2\text{O}$ ,  $\text{CuO}$ , copper nitrate hydrate, and copper acetate hydrate. These spectra were obtained at room temperature. The spectra of  $\text{CuO}$ , **NIT-350**, and **ACE-350** possessed a peak at 8984 eV corresponding to the  $1s \rightarrow 4p\pi$  transition.

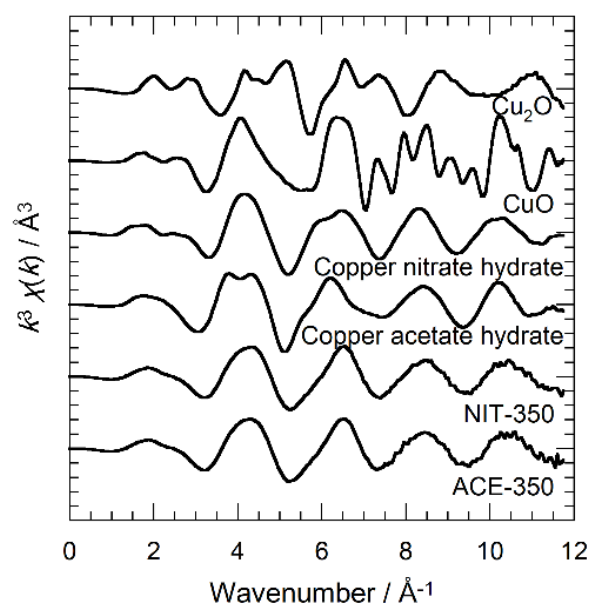

**Figure S10**  $k^3$ -weighted EXAFS oscillations of **NIT-350**, **ACE-350**,  $\text{Cu}_2\text{O}$ ,  $\text{CuO}$ , copper nitrate hydrate, and copper acetate hydrate measured at room temperature near the Cu K-edge.

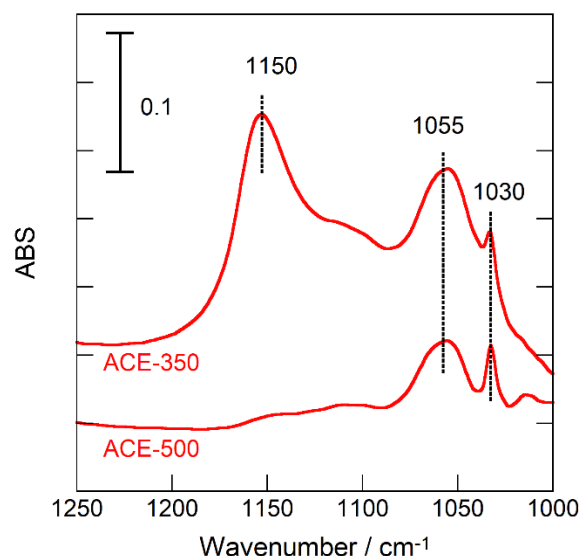

**Figure S11** FTIR spectra of methoxy species on ACE-350 and ACE-500.

Methanol vapor sorption on **ACE-350** and **ACE-500** was examined by *in-situ* Fourier transform infrared spectroscopy (*in-situ* FTIR) measurements. The windows of the FTIR cell was high purity  $\text{CaF}_2$ . The cell was put in a JASCO FT/IR 4600 instrument with a mercury-cadmium-telluride (MCT) detector. The catalyst powder was mixed with KBr (Wako). The weight ratio of the catalyst to KBr was 0.2. The obtained mixture (*ca.*  $9 \text{ mg}_{\text{cat}} \text{ cm}^{-2}$ ) were pressed into a thin self-supporting disk and set in the cell, heated at  $330^\circ\text{C}$  for 30 min under vacuum, and cooled down to  $205^\circ\text{C}$  under vacuum. Then, background spectra were collected at  $205^\circ\text{C}$ . The samples were exposed to methanol vapor (10 kPa) for 5 min at  $205^\circ\text{C}$ . Afterward, the methanol vapor was evacuated for 5 min at  $205^\circ\text{C}$ . Typically, 20 scans were collected for 1 spectrum, and the results were presented as absorbance spectra.

In **Figure S11**, three peaks are observed at 1150, 1055, and  $1030 \text{ cm}^{-1}$ . According to the reports<sup>3-4</sup>, the peak at  $1150 \text{ cm}^{-1}$  is attributed to on-top methoxy species on  $\text{Zr}^{4+}$ . The peaks at  $1055 \text{ cm}^{-1}$  and  $1030 \text{ cm}^{-1}$  are related to doubly bridging methoxy species on  $\text{Zr}^{4+}$ . On **ACE-500**, doubly bridging methoxy species were only observed, indicating that most of the surface methoxy species was strongly bounded on  $\text{ZrO}_2$ . On **ACE-350**, on the other hand, one-top and doubly bridging methoxy species are detected by FTIR. Assuming that a peak area is proportional to the population of the corresponding species, the on-top methoxy species is greater than the doubly bridging methoxy species. Therefore, methoxy species on **ACE-350** adsorbed more weakly on  $\text{ZrO}_2$  than that on **ACE-500**.



## References

1. Larmier, K.; Tada, S.; Comas-Vives, A.; Coperet, C. Surface Sites in Cu-Nanoparticles: Chemical Reactivity or Microscopy? *J. Phys. Chem. Lett.* **2016**, *7*, 3259-3263.
2. Naterer, G. F., *Advanced Heat Transfer*. Second ed.; CRC Press: Florida, **2018**.
3. Gennari, F. C.; Neyertz, C.; Meyer, G.; Montini, T.; Fornasiero, P. Hydrogen adsorption kinetics on Pd/Ce<sub>0.8</sub>Zr<sub>0.2</sub>O<sub>2</sub>. *Phys. Chem. Chem. Phys.* **2006**, *8*, 2385-2395.
4. Daturi, M.; Binet, C.; Lavalley, J. C.; Galtayries, A.; Sporken, R. Surface investigation on Ce<sub>x</sub>Zr<sub>1-x</sub>O<sub>2</sub> compounds. *Phys. Chem. Chem. Phys.* **1999**, *1*, 5717-5724.
